# Supplementary material
Source: Springer Nature journal article supplement (https://www.springermedizin.de/resource/supplementary/12879_2012_2298_MOESM2_ESM.pdf/9445466)
Supplement: MOESM2 [file 9445466]

Number of patients

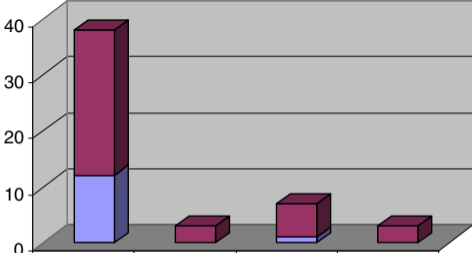

|          | Total HIV+ | Pts with O.I. | Pts under steroids | Pts with TB coinfection |
|----------|------------|---------------|--------------------|-------------------------|
| Dead     | 26         | 3             | 6                  | 3                       |
| Survived | 12         | 0             | 1                  | 0                       |
